# Supplementary material for: Human cerebral vascular amyloid contains both antiparallel and parallel in-register Aβ40 fibrils
Source: PubMed Central journal article supplement (PMC8528725; doi:10.1016/j.jbc.2021.101259), 2021-09-29
Supplement: mmc1.pdf [file mmc1.pdf]

## Supporting Information

### Human cerebral vascular amyloid contains both anti-parallel and parallel, in-register A $\beta$ 40 fibrils

Brandon A. Irizarry<sup>‡</sup>, Judianne Davis<sup>§</sup>, Xiaoyue Zhu<sup>§</sup>, Baayla D.C. Boon<sup>†,¶</sup>, Annemieke J.M. Rozemuller<sup>¶</sup>, William E. Van Nostrand<sup>§</sup> and Steven O. Smith<sup>‡,1</sup>

Figure S1. Parallel, in-register and anti-parallel fibrils observed using fibril seeds isolated from the CAA/ad and CAA/s cases by vessel stripping.

Figure S2. Intermittent sonication enhances templated fibril growth.

Figure S3. Harsh sonication nucleates A $\beta$ 40-WT fibril growth.

Figure S4. Morphological analysis of vascular-derived A $\beta$ 40-WT fibrils.

Figure S5. Molecular structures of A $\beta$  fibrils illustrating the relative positions of Phe19 and Leu34.

Figure S6. Structural propagation of A $\beta$ 40-WT fibrils.

Figure S7. Parallel, in-register fibrils seeded from parenchymal amyloid obtained from an atypical AD patient.

Figure S8. Presence of anti-parallel structure in fully hydrated fibrils.

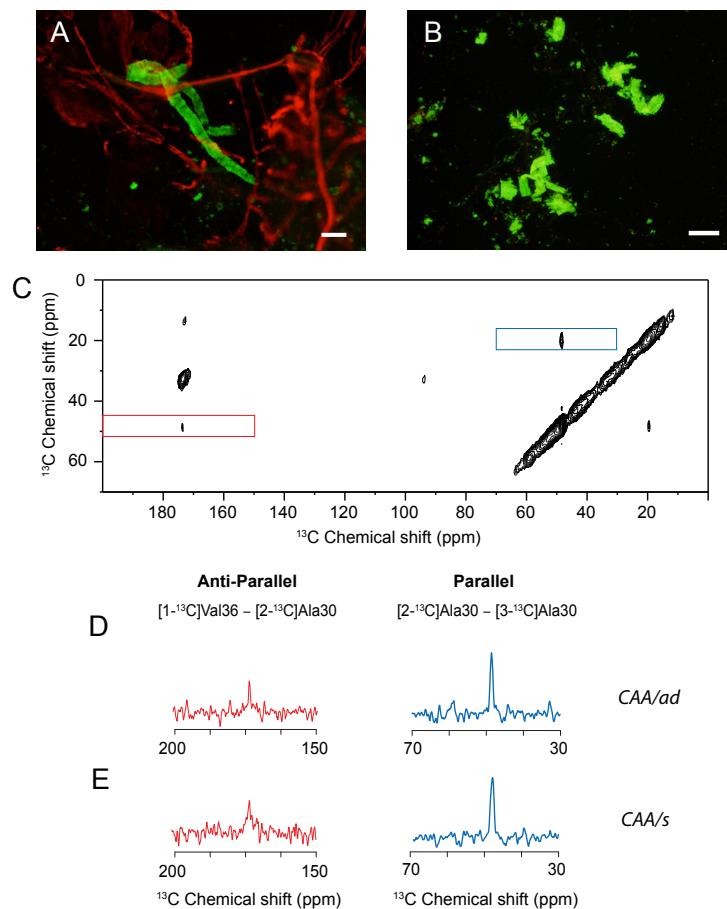

**Figure S1. Parallel, in-register and anti-parallel fibrils observed using fibril seeds isolated from the CAA/ad and CAA/s cases by vessel stripping.** *A*, Cerebral blood vessels were isolated by mechanical stripping from brain tissue (see Experimental Procedures). The isolated vessels were stained with thioflavin-S to identify vascular amyloid (green) and immunolabeled with an antibody to collagen IV to identify cerebral blood vessels (red). Scale bar = 100  $\mu\text{m}$ . *B*, The isolated blood vessels were treated with collagenase to free the vascular amyloid. Thioflavin-S staining allowed the isolated vascular amyloid to be visualized after sequential purification and collagenase-treatment. Immunolabeling the sample for collagen IV demonstrated the removal of vascular tissue. Scale bar = 100  $\mu\text{m}$ . *C*, Region of the 2D NMR spectrum of generation-3 A $\beta$ 40-WT fibrils derived from the CAA/ad case using stripped-vessel isolation. Cross peaks corresponding to fibrils having anti-parallel  $\beta$ -sheet structure and parallel, in-register  $\beta$ -sheet structure are located within the red and blue boxes, respectively. *D-E*, Rows are shown through the diagonal resonances of 2- $^{13}\text{C}$  Ala30 (48.6 ppm) and 3- $^{13}\text{C}$  Ala30 (20.1 ppm) of generation-3 A $\beta$ 40-WT fibrils derived from the CAA/ad (*D*) and CAA/s (*E*) cases.

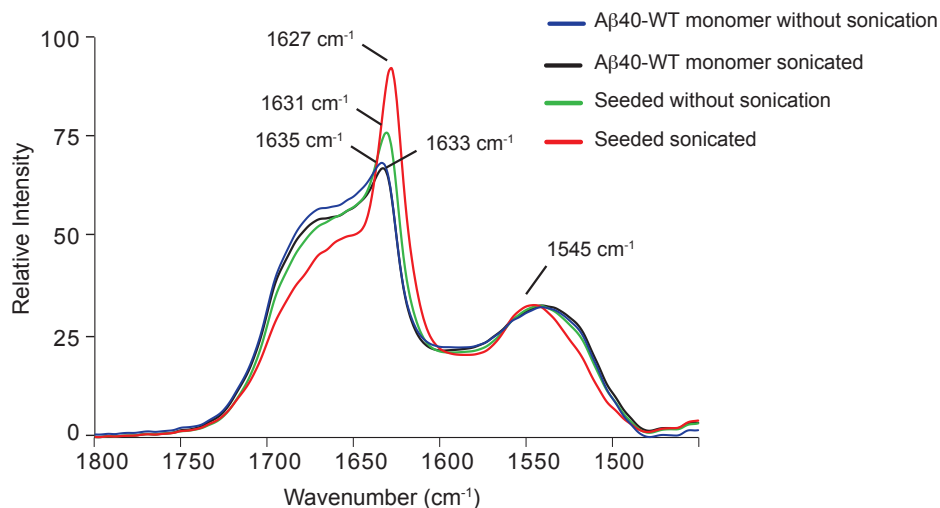

**Figure S2. Intermittent sonication enhances templated fibril growth.** Intermittent sonication fragments the templated fibrils to generate more nucleation points for A $\beta$  monomers to be incorporated into fibrils during elongation (23,56). To illustrate the effect of intermittent sonication on templated fibril growth, we prepared solutions containing A $\beta$ 40-WT monomer in the presence or absence of less than 1% (w/w) pre-formed A $\beta$ 40-WT fibrils (i.e. seeds) that were either not sonicated or subject to low power intermittent sonication for 24 h (see Experimental Procedures). Otherwise, the samples were incubated under quiescent conditions at 25 °C. FTIR spectra are shown after incubation for 4 d under these four conditions.

The FTIR spectra of sonicated (black trace) and non-sonicated A $\beta$ 40-WT monomer (blue trace) samples both exhibit a broad band between 1640 and 1690 cm<sup>-1</sup>, which is attributed to random coil structure. These spectra indicate that the A $\beta$ 40-WT monomers do not transition to mature fibrils under these incubation conditions. In contrast, the spectrum of the sonicated A $\beta$ 40-WT seeded sample is markedly different (red trace). This spectrum contains an amide I band characteristic  $\beta$ -sheet at 1627 cm<sup>-1</sup>. The shift of the amide II band from  $\sim$ 1535 cm<sup>-1</sup> to 1545 cm<sup>-1</sup> reflects the conversion of monomeric or oligomeric A $\beta$  to fibrils. Without intermittent sonication, the FTIR spectrum of the seeded A $\beta$ 40-WT sample (green trace) exhibits an amide I band at 1631 cm<sup>-1</sup> with intensity falling between the other two samples. Further, this sample lacks a shift in the amide II region. These results highlight the use of intermittent sonication for enhancing the rate of seeded growth in A $\beta$  peptide samples that contain <5% (w/w) of parental fibrils. Spectra were normalized to the intensity of the amide II absorbance band.

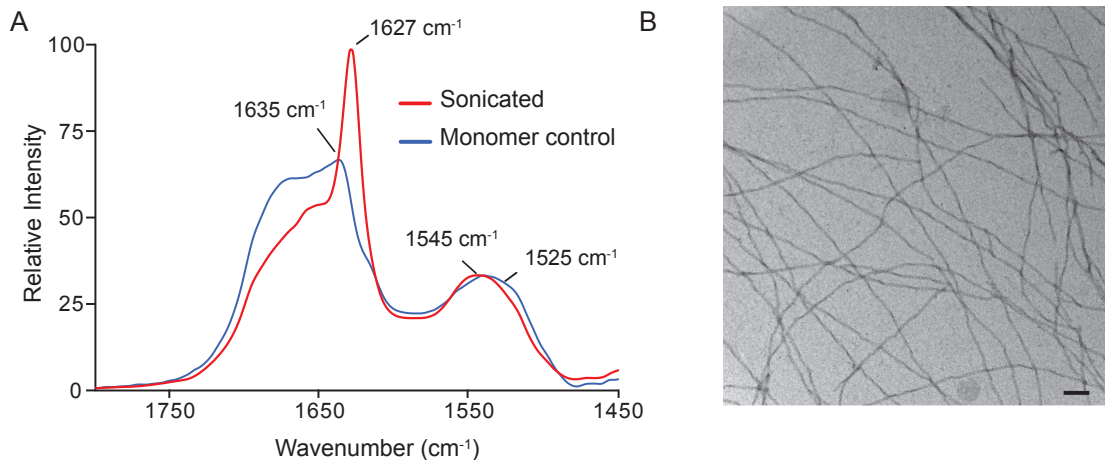

**Figure S3. Harsh sonication nucleates A $\beta$ 40-WT fibril growth.** *A*, To illustrate the potential for sonication to nucleate fibril growth of A $\beta$ 40-WT monomer, FTIR spectra are compared of A $\beta$ 40-WT monomer subject to strong sonication or left under quiescent conditions without sonication. Specifically, A $\beta$ 40-WT monomer (100  $\mu$ M) was incubated at 25  $^{\circ}$ C for 4 h under quiescent conditions and then split into two samples. One A $\beta$ 40-WT sample was subject to sonication for a total of 90 s at 30% power, while the second sample was not sonicated. Both samples were then allowed to incubate at 25  $^{\circ}$ C under quiescent conditions for an additional 20 h. After a total of 24 h, the spectrum of the sonicated A $\beta$ 40-WT sample exhibits a characteristic amide I  $\beta$ -sheet band at 1627  $\text{cm}^{-1}$  and amide II band at 1545  $\text{cm}^{-1}$ , indicating the formation of mature fibrils (red trace). In contrast, the FTIR spectrum corresponding to the non-sonicated A $\beta$ 40-WT sample after 24 h exhibits a broad band between 1640 and 1690  $\text{cm}^{-1}$ , which is attributed to random coil structure (blue trace). Spectra were normalized to the intensity of the amide II absorbance band. *B*, The sonicated A $\beta$ 40-WT sample exhibits long homogenous twisted fibrils after 24 h of incubation by negative-stain TEM. Scale bar = 100 nm. These results illustrate the need to calibrate sonication power levels and duration to reduce the self-nucleation of A $\beta$ 40-WT monomers.



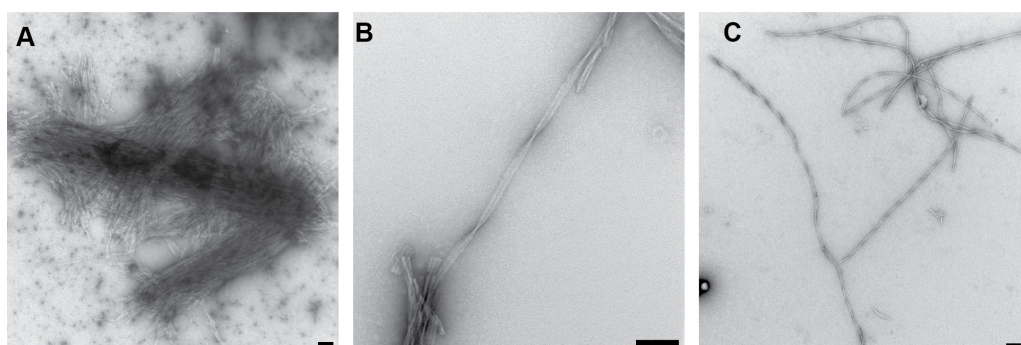

| Table 1      | CAA/ad  |         | CAA/s   |         |
|--------------|---------|---------|---------|---------|
|              | Bundled | Twisted | Bundled | Twisted |
| Generation-1 | 6       | 28      | 29      | 1       |
|              | 4       | 30      | 30      | 3       |
| Generation-3 | 0       | 30      | 30      | 14      |
|              | 0       | 30      | 28      | 11      |
| Generation-6 | 0       | 30      | 3       | 30      |
|              | 0       | 30      | 2       | 29      |

**Figure S4. Morphological analysis of vascular-derived A $\beta$ 40-WT fibrils.** A-C, Negative stain TEM images of vascular-derived A $\beta$ 40-WT fibrils from the CAA/ad and CAA/s cases that illustrate the different fibril morphologies observed in generations 1-6. Scale bars correspond to 100 nm. We quantified the morphological distribution of A $\beta$ 40-WT fibrils at different fibril generations by separating fibril morphologies into two categories, either short, bundled fibrils (A) or long, twisted fibrils (B,C). Thirty grid squares in several different regions of the stained grids were analyzed to obtain a representative sampling of the fibril populations. Each grid was screened for the presence of either bundled or twisted fibrils. The presence of either morphology within a single grid square was recorded once regardless of the *number* of fibrils with that specific morphology. If both morphologies were present within a single grid square they both were scored. Two independent samples were analyzed for generations 1, 3 and 6 of both the CAA/ad and CAA/s cases. In general, the population of short, bundled fibrils decreased with successive generations, while the population of long, twisted fibrils increased. The distributions, however, were very different across generations for the two CAA cases.

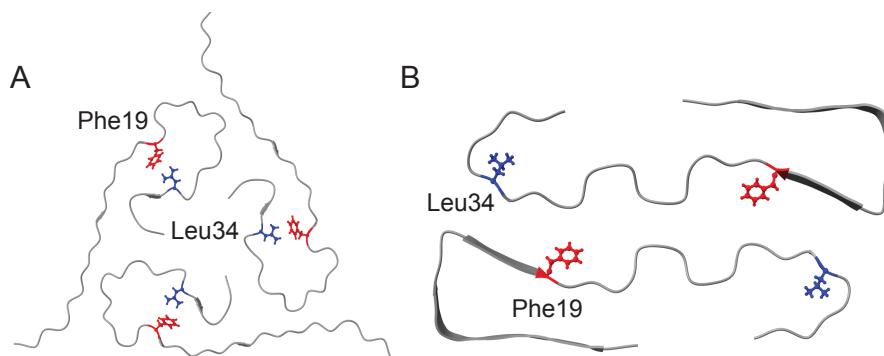

**Figure S5. Molecular structures of A $\beta$  fibrils illustrating the relative positions of Phe19 and Leu34.** Phe19 and Leu34 often have intra-molecular and inter-molecular packing interactions in A $\beta$ 40-WT fibrils. *A*, Human-derived A $\beta$ 40-WT fibril propagated from brain parenchymal amyloid of an AD patient (PDB ID 2M4J) illustrate intra-molecular packing of Phe19 and Leu34. This packing geometry is also often observed in A $\beta$ 40-WT fibrils formed *in vitro*. *B*, Human-derived A $\beta$ 40-WT fibril purified from vascular amyloid obtained from meningeal tissue of an AD patient (PDB ID 6SHS). In comparison to (*A*), neither intra-molecular nor inter-molecular contacts between Phe19 and Leu34 are present. In these fibrils, the individual peptides adopt a more extended conformation.

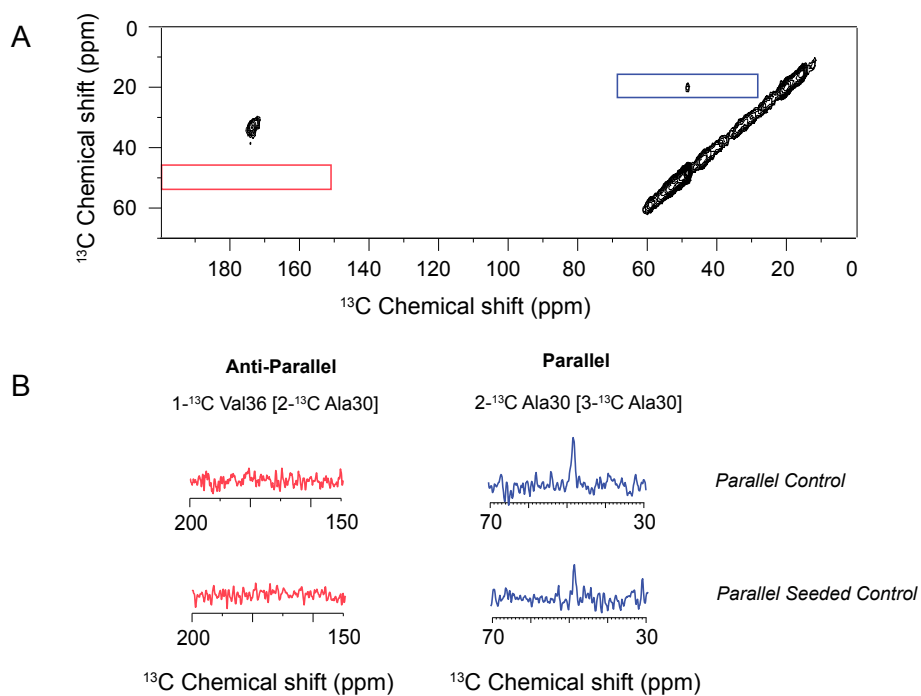

**Figure S6. Structural propagation of A $\beta$ 40-WT fibrils.** *A*, Region of the 2D NMR spectrum of parallel A $\beta$ 40-WT parental fibrils. *B*, Rows are shown through the diagonal resonances as in panel (*A*) corresponding to A $\beta$ 40-WT parental (parallel control) and daughter (parallel seeded control) fibrils. The location of the rows shown correspond approximately to the positions of the colored boxes in the 2D NMR spectrum. *In vitro* parental A $\beta$ 40-WT fibrils were first developed for these experiments through multiple rounds of templated fibril growth and screened for parallel, in register fibril structure (Panel *B*, parallel control). Next, a small amount of the parental A $\beta$ 40-WT fibril seeds ( $\sim 1$   $\mu$ g) was added to the A $\beta$ 40-WT monomer and propagated using the seeding procedure described in the main text. The rows corresponding to the parallel seeded control sample (Panel *B*) exhibit a single cross peak indicative of parallel, in register  $\beta$ -sheet fibril structure. A corresponding antiparallel cross peak is not observed. These results indicate that the propagation procedure allows for structural conservation from parent to daughter fibrils.

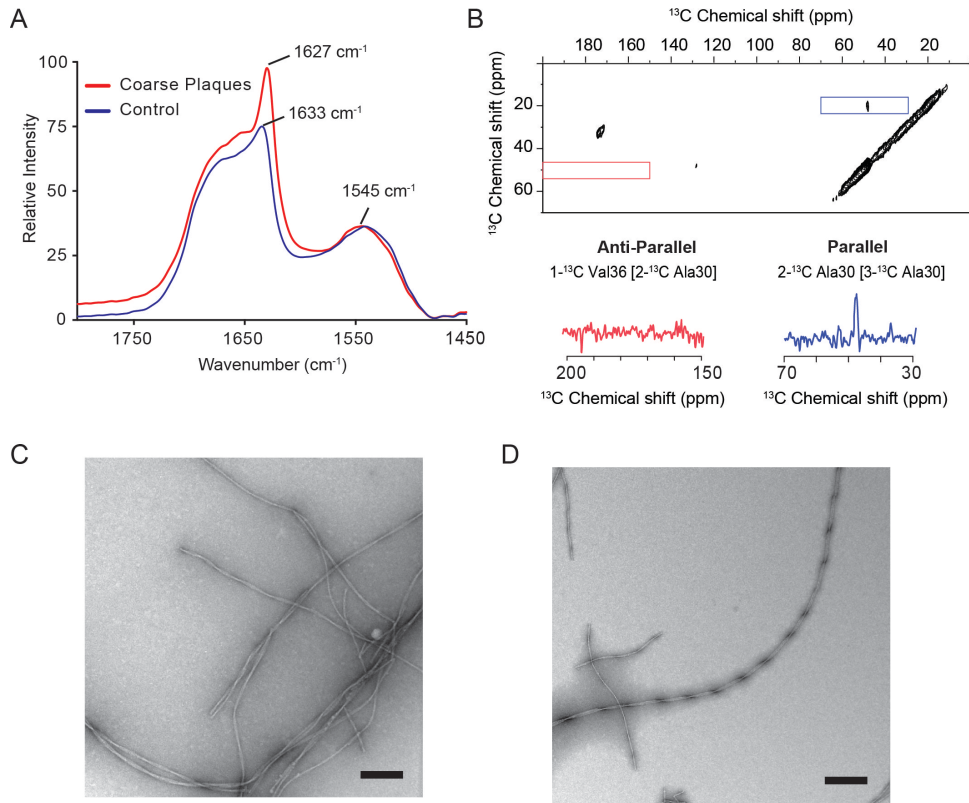

**Figure S7. Parallel, in-register fibrils seeded from parenchymal amyloid obtained from an atypical AD patient.**

Structural studies of A $\beta$  fibrils derived from parenchymal deposits have found that a parallel, in-register  $\beta$ -sheet conformation is a common feature of brain-derived A $\beta$  fibrils. Here, we utilize parenchymal plaques isolated from an atypical AD case that presented parenchymal plaques with coarse morphology in the absence of vascular deposition. The parenchymal-derived amyloid functioned as seeds to drive fibrillization of monomeric A $\beta$ 40-WT. These fibrils allowed for a site-specific comparison between parenchymal and vascular amyloid.

The parenchymal amyloid deposits were isolated using LCM and propagated using the same seeding procedure described in the main-text (see Experimental Procedures). *A*, Overlay of FTIR spectra collected for the A $\beta$ 40-WT monomer incubated in the presence (red trace) and absence (blue trace) of parenchymal amyloid seeds. The FTIR spectrum of the sample incubated with parenchymal fibril seeds exhibits an amide I band at 1627  $\text{cm}^{-1}$  and a shift of the amide II peak from  $\sim 1530 \text{ cm}^{-1}$  to  $\sim 1550 \text{ cm}^{-1}$ , demonstrating that the LCM particles seeded the formation of generation-1 fibrils. In contrast, the FTIR spectrum of the control sample exhibits a broad band between 1640 and 1690  $\text{cm}^{-1}$ , a slight absorbance at 1633  $\text{cm}^{-1}$ , and the absence of a shift in the amide II region. *B*, Region of 2D  $^{13}\text{C}$  NMR spectrum of generation-3 A $\beta$ 40-WT fibrils derived from parenchymal amyloid deposits of an atypical AD case with coarse plaque

morphology using LCM. Rows are shown through the diagonal NMR resonances at 48.6 ppm for the 2-<sup>13</sup>C Ala30 resonance (red) and 20.1 ppm for the 3-<sup>13</sup>C Ala30 resonance (blue). Compared to the NMR spectra collected for generation-3 of vascular-derived Aβ40-WT fibrils, generation-3 parenchymal-derived Aβ40-WT fibrils are primarily composed of parallel, in-register β-sheet. These results suggest that anti-parallel β-sheet fibrils are unique to vascular amyloid. *C,D*, TEM images of generation-1 Aβ40-WT fibrils from the atypical AD case. Fibrils composed of single twisted protofilaments and pairs of twisted protofilaments were observed. The crossover distances between twists for these fibrils were typically > 100 nm. No highly twisted fibrils or short-bundled fibrils were observed. Scale bars = 140 nm (*C*), 280 nm (*D*).

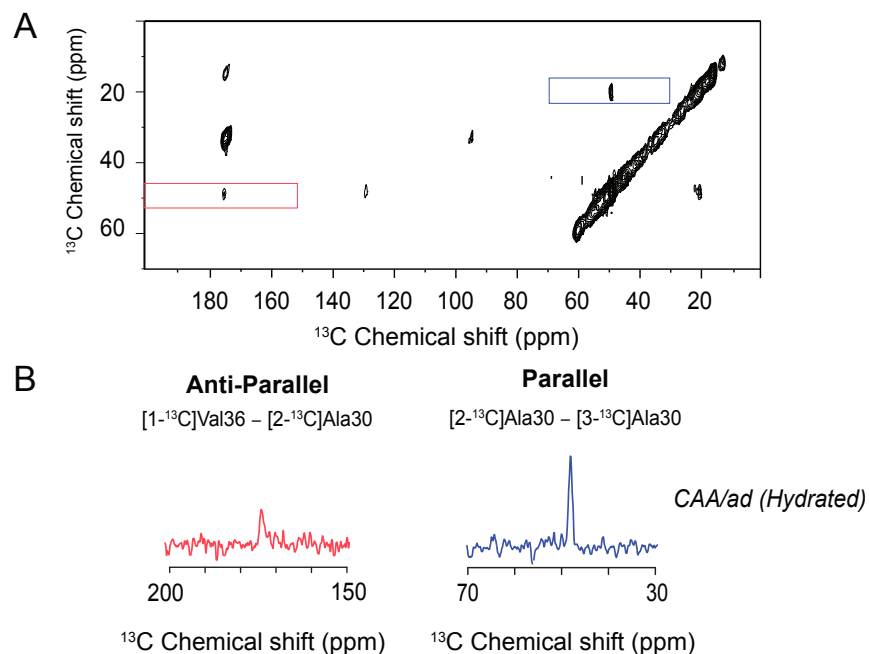

**Figure S8. Presence of anti-parallel structure in fully hydrated fibrils.** *A*, Region of the 2D  $^{13}\text{C}$  NMR spectrum corresponding to generation-3 A $\beta$ 40-WT fibrils derived from the CAA/ad case using LCM. A second sample of vascular amyloid was isolated from the CAA/ad case by LCM and then propagated using the same procedure described in the main text. Upon maturation of the generation-3 sample, the sample was subject to ultracentrifugation at  $>100,000 \times g$  for 2 h. The excess solvent containing potential low molecular-weight aggregates was manually removed. The remaining pellet was transferred directly into a 4 mm MAS rotor for NMR analysis. *B*, Rows are shown through the diagonal resonances of 2- $^{13}\text{C}$  Ala30 (red) at 48.6 ppm and 3- $^{13}\text{C}$  Ala30 (blue) at 20.1 ppm, boxed in panel (*A*), for generation-3 A $\beta$ 40-WT fibrils derived from the CAA/ad patient in the fully hydrated state. This result indicates that NMR cross peaks corresponding to anti-parallel fibril structure are observed in near-native conditions and do not arise from the presence of protofibrils or oligomers.
